# Supplementary material for: Carbon aerogel-based solid-phase microextraction coating for the analysis of organophosphorus pesticides
Source: Royal Society of Chemistry journal article supplement (doi:10.1039/d0ay02002h), 2020-11-20
Supplement: d0ay02002h1.pdf [file d0ay02002h1.pdf]

## **Electronic Supplementary Information**

### **Carbon aerogel-based solid-phase microextraction coating for the analysis of organophosphorus pesticides**

Piia Jõul, Merike Vaher and Maria Kuhtinskaja

Department of Chemistry and Biotechnology, Tallinn University of Technology, Tallinn,  
Estonia

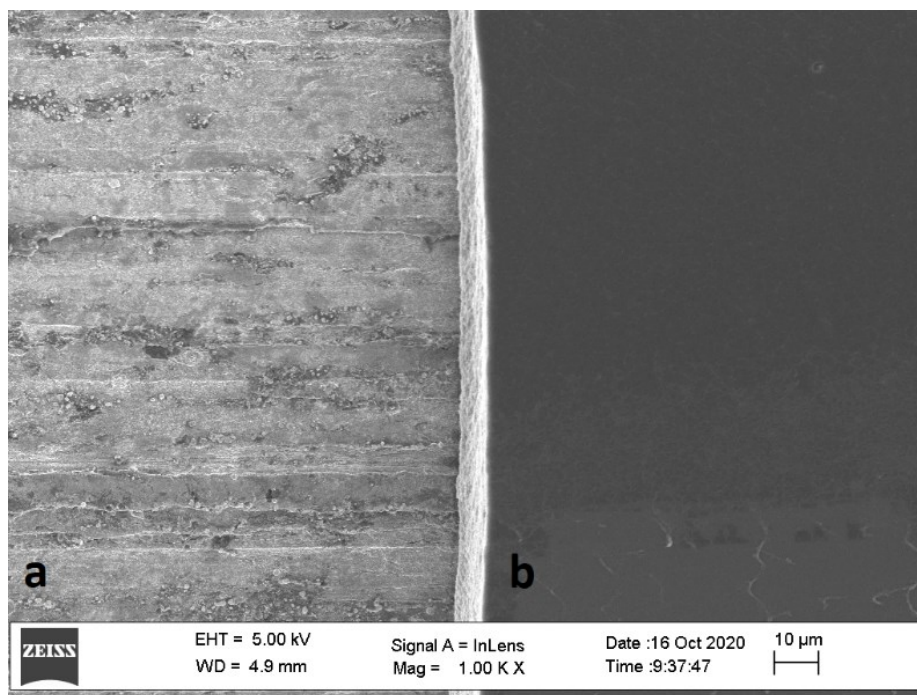

**Fig. S1.** SEM image of the surface of the uncoated stainless steel wire (a) and CA-coated SPME fiber (b)

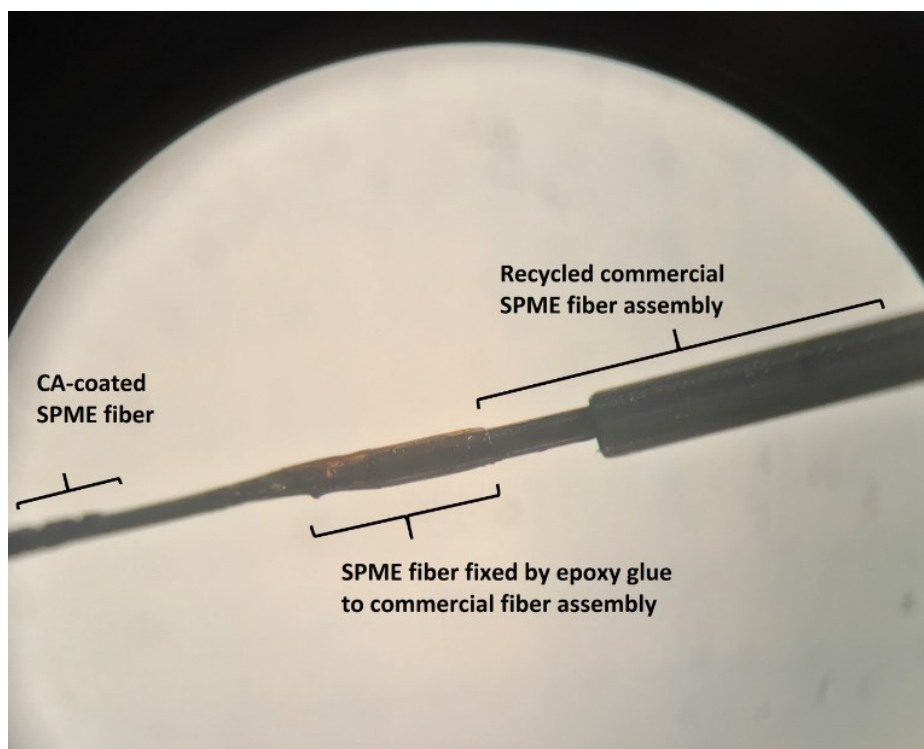

**Fig. S2.** The prepared coated SPME fibers fixed by epoxy glue to a recycled commercial SPME fiber assembly

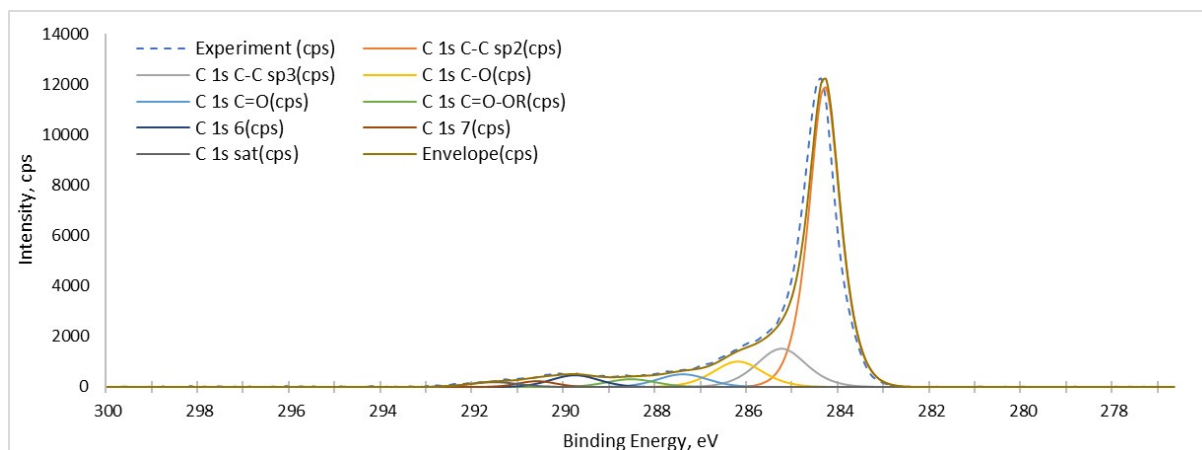

**Fig. S3.** The XPS C1s curve fitting of CA-based SPME coating material.

**Table S1.** The quantification data of the XPS analysis of CA-based SPME coating material.

| Peak         | Type | Position<br>BE (eV) | FWHM<br>(eV) | Raw Area<br>(cps eV) | RSF   | Atomic<br>Mass | Atomic<br>Conc % | Mass<br>Conc % |
|--------------|------|---------------------|--------------|----------------------|-------|----------------|------------------|----------------|
| O 1s oxide   | Comp | 530.533             | 1.480        | 277.2                | 0.780 | 15.999         | 0.56             | 0.74           |
| O 1s =O      | Comp | 531.656             | 1.174        | 322.3                | 0.780 | 15.999         | 0.66             | 0.86           |
| O 1s -O-     | Comp | 533.069             | 1.399        | 779.9                | 0.780 | 15.999         | 1.59             | 2.08           |
| O 1s H2O     | Comp | 535.872             | 1.483        | 517.7                | 0.780 | 15.999         | 1.05             | 1.38           |
| C 1s C-C sp2 | Comp | 284.424             | 0.784        | 11033.0              | 0.278 | 12.011         | 67.65            | 66.80          |
| C 1s C-C sp3 | Comp | 285.357             | 1.264        | 2130.6               | 0.278 | 12.011         | 13.06            | 12.90          |
| C 1s C-O     | Comp | 286.307             | 1.256        | 1407.9               | 0.278 | 12.011         | 8.63             | 8.52           |
| C 1s C=O     | Comp | 287.506             | 1.273        | 669.4                | 0.278 | 12.011         | 4.10             | 4.05           |
| C 1s C=O-OR  | Comp | 288.663             | 1.253        | 440.6                | 0.278 | 12.011         | 2.70             | 2.67           |

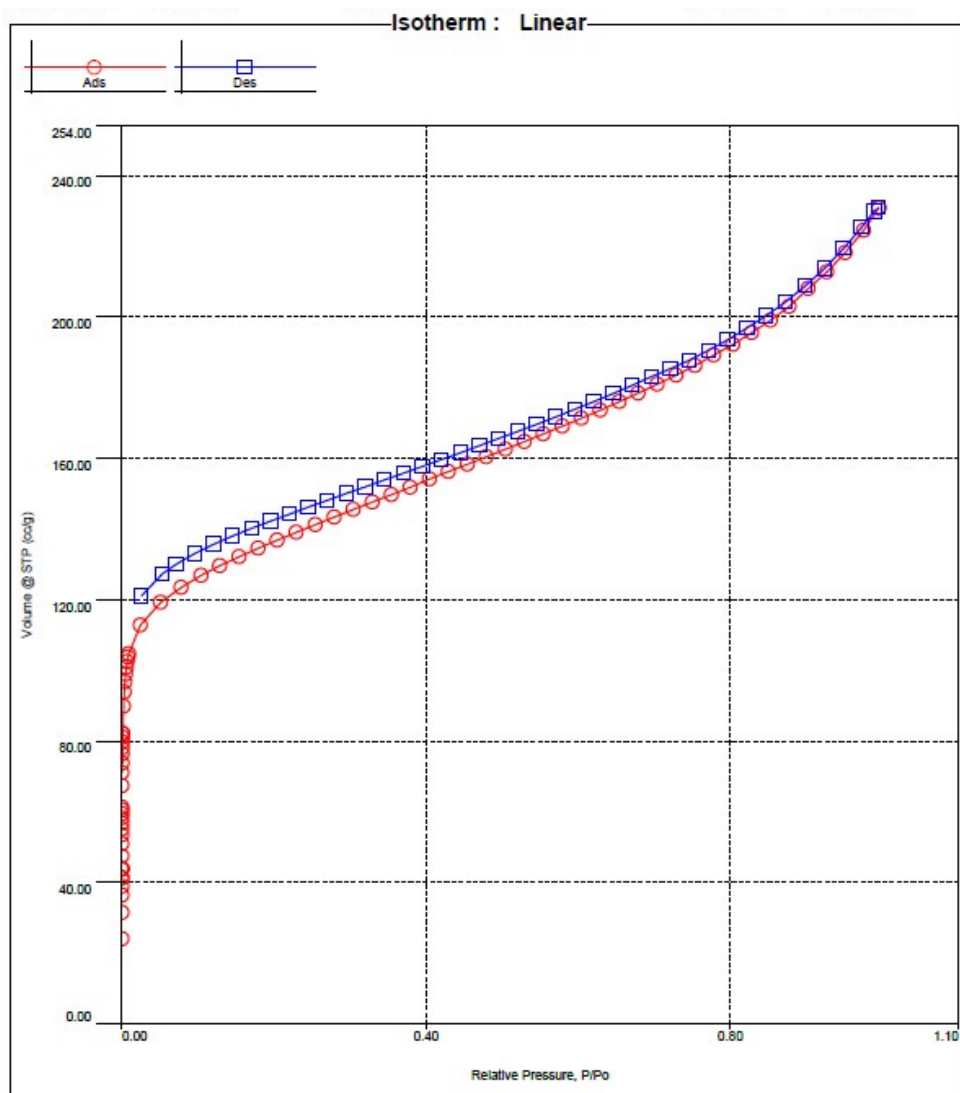

**Fig. S4.** N<sub>2</sub> adsorption and desorption isotherms of CA-based SPME coating material. Circle markers: adsorption, square markers: desorption branches

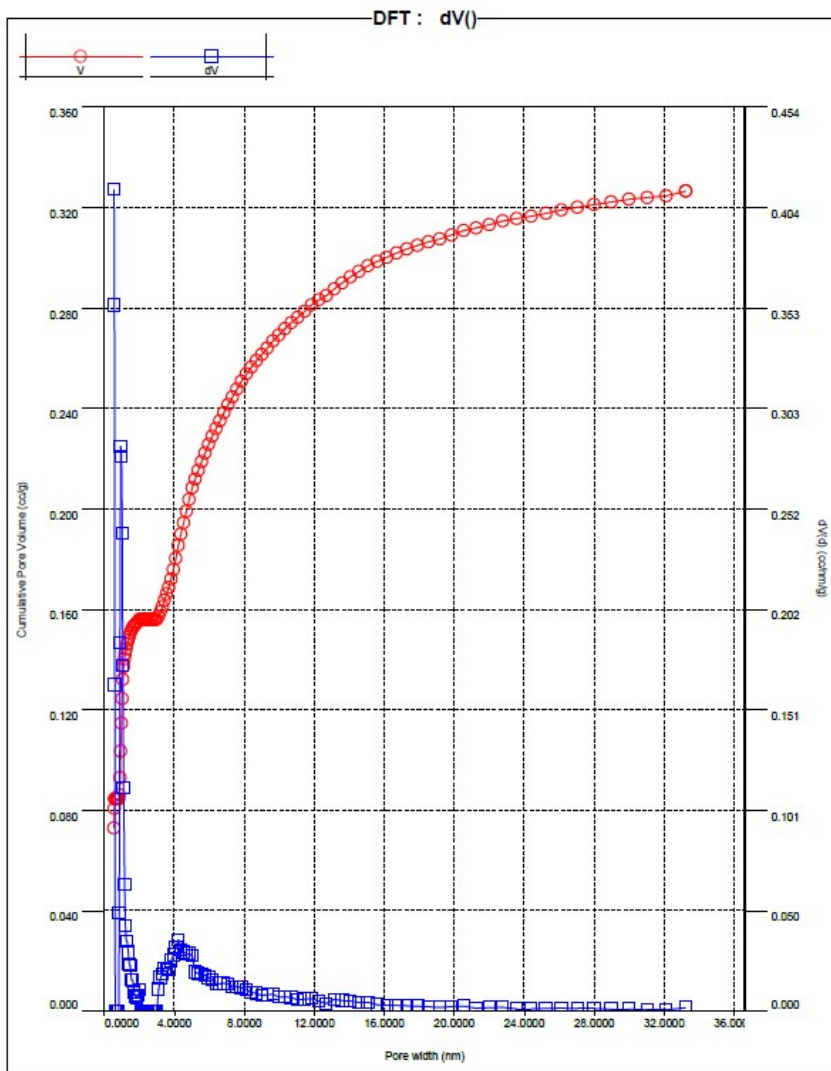

**Fig. S5.** DFT pore-size distribution of CA-based SPME coating material
